# A Phase I trial to inform clinical protocols for the safe administration of psilocybin-assisted psychotherapy

Jennifer N. Bennett<sup>1†\*</sup>, Michael D. Blough<sup>1†</sup>, Ian Mitchell<sup>2</sup>, Lyle Galloway<sup>3,4</sup>, and Ravinder Bains<sup>1,5,6†</sup>

<sup>1</sup>ATMA Journey Centers Inc., Calgary, Alberta, Canada

<sup>2</sup>Department of Emergency Medicine, University of British Columbia, Vancouver, BC, Canada

<sup>3</sup>Department of Oncology, University of Calgary, Calgary, Alberta, Canada

<sup>4</sup>Department of Family Medicine, University of Calgary, Calgary, Alberta, Canada

<sup>5</sup>Department of Psychiatry, Cumming School of Medicine, University of Calgary, Calgary, Alberta, Canada

<sup>6</sup>Short Stay Unit, Peter Lougheed Centre, Calgary, Alberta, Canada

†These authors contributed equally and share first authorship

## \*Correspondence:

Jennifer Bennett

[jennifer@atmajourney.com](mailto:jennifer@atmajourney.com)

## Keywords:

Psilocybin, psychedelics, psilocybin-assisted therapy, psychedelic-assisted therapy, psilocybin safety, clinical protocols, adverse effects, blood pressure.

## Abstract

This Phase I trial aims to inform the development of safety protocols for psilocybin-assisted therapy. Psychedelics, including psilocybin, are increasingly being recognized as a successful treatment option for many mental health concerns. In order to decrease the risks associated with its clinical use, more data is required regarding its physiological effects in healthy individuals. Safety assessments (heart rate, blood pressure, temperature, and ECG data), as well as adverse event evaluations were the primary outcome measures used to assess the physiological effects of 25 mg of psilocybin extract administered to 14 healthy individuals. We hypothesized that there would be a transient, clinically insignificant rise in both blood pressure and heart rate that would not result in any long-term adverse effects. No unexpected effects were observed, blood pressure and heart rate returned to normal as drug effects waned, and all participants had normal two-month follow-ups. Mean peak systolic and diastolic blood pressures during the psilocybin session were 145.93 ( $SD = 19.01$ ) and 93.93 ( $SD = 9.75$ ), respectively. While this represents a significant increase from baseline ( $p < 0.0001$ ), a healthy cardiovascular system is capable of tolerating such levels for a longer time period than the brief duration of drug effects. Therefore, we suggest implementing focused and limited screening protocols to balance patient safety and

47 accessibility. Secondary outcomes of this trial centered on the subjective effects of psilocybin,  
48 assessed via the QIDS-SR16 and the MEQ-30. There was a statistically significant decrease in  
49 QIDS-SR16 scores from baseline scores ( $M = 3.50$ ,  $SD = 2.35$ ) to eight-week follow-up scores  
50 ( $M = 1.86$ ,  $SD = 0.86$ ),  $p = 0.018$ . Mean MEQ-30 scores, assessed on day two and seven after the  
51 psilocybin session, indicate participants had full mystical experiences.

52

## 53 **Introduction**

54

55 Over the last two decades, research on psychedelic drugs for the treatment of mental health  
56 disorders has increased exponentially. Psilocybin – the psychoactive compound in  
57 hallucinogenic mushrooms that are largely of the genus *Psilocybe* – has been gaining  
58 prominence in the treatment of generalized anxiety disorder, treatment-resistant depression, and  
59 end-of-life anxiety in palliative care patients (Carhart-Harris & Goodwin, 2017; Siegel et al.,  
60 2021). Worldwide, countless studies have been conducted examining the efficacy of psilocybin  
61 in treating such disorders, with many more clinical trials currently underway to assess its  
62 efficacy in managing other indications such as eating disorders, post-traumatic stress disorder  
63 (PTSD), substance use disorders, obsessive-compulsive disorder (OCD), chronic pain, and  
64 migraines. While its efficacy has been broadly accepted by now, further exploration is  
65 nonetheless warranted for potential contraindications and adverse events that psilocybin may  
66 induce.

67

68 Psilocybin is classified as a Schedule I drug in the United States (DEA, 2020); this classification  
69 has largely influenced the stigma that it has high abuse potential, no accepted medical use, and  
70 can result in serious adverse events. However, research demonstrates contrary findings, insofar  
71 as psilocybin not only has a low abuse potential but can actually aid in substance abuse  
72 cessation and treat multiple mental health disorders, while maintaining a relatively positive  
73 safety profile (Lowe et al., 2021). Nonetheless, as with any medication, establishing proper  
74 screening and safety protocols is critical in order to implement this therapy responsibly.

75

76 When used properly, psilocybin has a favourable risk-benefit ratio. Mental illnesses are  
77 devastating disorders that carry the potential risk of harm to self and harm to others, both directly  
78 and indirectly; psilocybin, on the contrary, has a high therapeutic index of 641 (a better safety  
79 profile than both aspirin and nicotine), and has significant potential to decrease the burden of  
80 these disorders (Lowe et al., 2021). Although generally considered physiologically safe and  
81 psychologically beneficial, it is important that clients are supervised during the acute psychedelic  
82 experience so that support can be offered should any potential anxiety, trauma, impaired  
83 decision-making, and/or rare physiological side effects arise. As with any pharmaceutical, there  
84 are certain concomitant medications and medical conditions that should be avoided in order to  
85 warrant the drug's safe use. There is the need to gather more data examining baseline physiology  
86 in healthy individuals to demonstrate that psilocybin can be safely administered in a clinical  
87 setting. From the results obtained in our Phase I safety trial, we aim to inform the development  
88 of protocols for psilocybin-assisted psychotherapy.

89

90 Vital signs and adverse event assessments were the primary outcome measures in this trial. Such  
91 assessments can help identify which populations present with an elevated risk, and thus for  
92 whom extra caution would be advisable. A proper screening protocol can then be developed

93 from the evaluation of adverse events. Several studies have previously assessed the  
94 cardiovascular effects of psilocybin, in which transient increases in blood pressure were  
95 observed (Hasler et al., 2004; Daniel & Haberman, 2017; Carbonaro et al., 2018). Hasler et al.  
96 (2004) also showed that ECG was unaffected with various doses of psilocybin; however,  
97 Dahmane et al. (2021) showed a minor effect of 25mg on QTc prolongation, in which the effect  
98 of 25mg of psilocybin meets a low level of concern (<10 ms) regarding non-cardiac medications  
99 by the FDA. As such, this trial sought to further evaluate sympathomimetic effects including  
100 heart rate, blood pressure, cardiac electrical activity via ECG, and temperature. Adverse event  
101 assessments also included monitoring for side effects for up to two months after the psilocybin  
102 session.

103  
104 The secondary exploratory objective of this study examined the effects of psilocybin on both  
105 mood and mystical experience. Two questionnaires – the Quick Inventory of Depressive  
106 Symptomatology Self-Report 16-item (QIDS-SR16) and the 30-item Revised Mystical  
107 Experience Questionnaire – were used as the assessment tools to measure these variables.  
108

## 109 **Materials and Methods**

### 110 *Study Design*

111 This was an open label, single arm, single centre Phase I safety trial that took place at ATMA  
112 Journey Centers in Calgary, Canada. Participants were recruited nationally, and during the  
113 enrollment process, participants were screened by the Primary Investigator for eligibility based  
114 on the criteria approved by Health Canada. Participants were followed for two months after the  
115 psilocybin session. This trial was approved by The Health Research Ethics Board of Alberta  
116 (HREBA) – Clinical Trials Committee (CTC).  
117

### 118 *Investigational Product*

119 The psilocybin product, PEX010, was provided by Psilo Scientific Ltd. in the form of psilocybin  
120 standardized extract powder, encapsulated in hydroxypropyl methylcellulose capsules. Each  
121 capsule contained 25 mg of psilocybin and was manufactured in full compliance with Good  
122 Manufacturing Practices (GMP) required to manufacture investigational medicinal products in  
123 Canada.  
124

### 125 *Participants*

126 During screening, applicants were evaluated for eligibility criteria, in which 14 participants were  
127 selected. The criteria required that participants be aged 18-65 years of age, be physically and  
128 mentally healthy as determined by a primary care physician via physical and mental  
129 examinations, be a medical or mental healthcare provider with professional accreditation, have a  
130 negative pregnancy test at study entry and prior to the psilocybin session if of child-bearing  
131 potential, and agree to use adequate forms of birth control from study entry to 10 days after the  
132 psilocybin session. Exclusion criteria included both active psychotic symptoms and a history of  
133 psychotic symptoms, bipolar disorder, schizophrenia, first- or second-degree relatives with a  
134 history of psychotic symptoms, bipolar disorder, or schizophrenia, the use of psychotropic  
135 medications including SSRIs, SNRIs, MAOIs, or lithium, a diagnosis of either dementia or  
136 delirium, a high risk for coronary artery disease, uncontrolled cardiopulmonary  
137 disease/cardiovascular disease, uncontrolled hypertension greater than 140/90mmHg assessed on  
138

139 three separate occasions, a history of QT prolongation or on concomitant medications carrying a  
140 risk of QT prolongation, aneurysm, a history of intracerebral hemorrhage, hepatic cirrhosis,  
141 hepatorenal disease, any other clinically significant medical condition or disease, suicide risk, or  
142 have a known sensitivity or intolerability to psilocybin or its metabolites. This eligibility criteria  
143 were developed based on previously researched contraindications and other potential  
144 contraindications that require further research before psilocybin can comfortably be used by such  
145 populations. Participants were required to sign an informed consent form before enrollment.  
146

147 The criterion that participants must hold professional accreditation as a medical or mental  
148 healthcare provider produced a unique opportunity to examine the effectiveness of psilocybin in  
149 a clinical setting; healthcare workers who work directly with patients suffering from mental  
150 illness are likely to be valuable judges of a treatment's utility and possess a constructive  
151 perspective. Although not a measurable objective in this study, it gives the professionals  
152 involved in the development of protocols and the implementation of this novel treatment a  
153 practical understanding of how and why it is efficacious, as well as laying the foundation for  
154 future research examining this as a formal objective.  
155

156 As shown in Table 1, this study enrolled 14 participants aged 32-64. Participants were  
157 predominately female (78.6%), with 77% of total applicants being female. Although this is  
158 disproportionate, an analysis performed by the World Health Organization including 104  
159 countries showed that 70% of the total population of workers in the health and social sector are  
160 female (WHO, 2019).  
161

#### 162 *Outcome Measures*

163 The primary objective of this Phase I clinical trial was to collect data regarding the safety of  
164 psilocybin when administered to healthy individuals. Safety was assessed by documenting vital  
165 signs and recording adverse events (AEs) and serious adverse events (SAEs).  
166

167 The secondary exploratory objective utilized two self-assessment questionnaires (the QIDS-  
168 SR16 and the MEQ-30). These questionnaires were intended to evaluate the general nature of the  
169 subjective effects occasioned by the consumption of psilocybin and to determine its impacts on  
170 the participants' mental health following their experimental session.  
171

#### 172 *Safety Assessments*

173 For safety evaluations, SAEs (defined as any untoward medical occurrence that happens after  
174 psilocybin treatment that either results in death, is life-threatening, requires in-patient  
175 hospitalization, results in persistent or significant disability/incapacity, results in a congenital  
176 anomaly or birth defect, or a loss of pregnancy) and all adverse events (defined as unfavourable  
177 and unintended signs, symptoms, or disease associated with a treatment) were formally assessed  
178 during the psilocybin session, as well as two days, seven days, and eight weeks following the  
179 psilocybin session. During this eight-week time period, participants were also instructed to report  
180 any SAEs immediately. AEs were assessed by severity (mild, moderate, severe, life-threatening,  
181 or fatal). Specific AEs that were investigated include nausea, vomiting, headache, anxiety,  
182 confusion, fatigue, and mania or psychotic symptoms. A subset of AEs – adverse events of  
183 special interest (AESI) – that could be indicative of QT interval prolongation or cardiac  
184 arrhythmias (including ECG abnormalities during the psilocybin session, sudden death, non-

185 postural syncope, palpitations, or seizures) were assessed to evaluate psilocybin's impact on  
186 cardiac function. A second AESI involved the assessment of suicide risk via the following  
187 behaviours: suicide, suicide attempts, self-injurious behaviour associated with suicidal ideation,  
188 or suicidal ideation judged to be serious or severe in the opinion of the Principal Investigator.  
189 Treatment emergent adverse events (TEAEs; defined as AEs with an onset after drug  
190 administration and up to two days afterwards) were also assessed by severity, and included  
191 assessments for nausea, vomiting, headache, anxiety, confusion, fatigue, and mania or psychotic  
192 symptoms that emerged soon after the psilocybin session and lasted for longer than 24 hours  
193 after cessation of drug effects. Adverse drug reactions (ADRs; defined as a serious adverse event  
194 that is not identified in nature, severity, or frequency in the risk information set out in the product  
195 monograph) were monitored, with special attention being paid to unexpected ADRs.

196  
197 During the psilocybin session, blood pressure, heart rate, and temperature were measured every  
198 hour, as well as when signs or symptoms warranted further vital sign measurement. 30-second  
199 electrocardiogram (ECG) recordings were obtained every hour. Blood pressure and heart rate  
200 were monitored using the Large Cuff Easy@Home Digital Upper Arm Blood Pressure Monitor,  
201 FDA-cleared for over-the-counter use. Temperature was assessed via the FOR A IR42 Forehead  
202 Thermometer, licensed by Health Canada. ECG recordings were obtained using the  
203 KardiaMobile Six-Lead Personal EKG Monitor.

#### 204 205 *Statistical Analysis*

206 The statistical analysis was completed using SPSS 29.0 and Prism 9.

#### 207 208 **Results**

209  
210 Table 2 summarizes the main results of this study. A t-test for dependent means was used to  
211 assess the effect that psilocybin had on peak mean arterial pressure (MAP). To do this, a  
212 corresponding MAP was calculated from each blood pressure measurement that was taken  
213 during the psilocybin session, using the formula  $MAP = DP + 1/3(SP - DP)$ . The highest MAP  
214 of each participant was documented and used to help determine the risk psilocybin poses for the  
215 cardiovascular system. Figure 1 compares baseline to peak MAP. There was a statistically  
216 significant effect  $t(13) = -5.56, p < 0.001$ , of psilocybin on MAP. Mean arterial pressure  
217 increased from an average baseline of 91.55 mmHg ( $SD = 7.59$ ) to an average peak of 110.76  
218 mmHg ( $SD = 12.15$ ) during the psilocybin session. Baseline MAP ranged from 79.67–104  
219 mmHg, whereas peak MAP ranged from 93.33–126.67 mmHg.

220  
221 A t-test for dependent means was conducted to assess if psilocybin had an effect on peak systolic  
222 blood pressure (SBP). The highest SBP for each participant during the psilocybin session was  
223 documented and these were compared to their baseline SBPs. Figure 2 compares baseline,  
224 average, and peak SBPs in each participant. There was a statistically significant effect  $t(13) = -$   
225  $5.44, p < 0.001$ . Systolic blood pressure increased from an average baseline of 121.5 mmHg  
226 ( $SD = 11.59$ ) to an average peak of 145.93 mmHg ( $SD = 19.01$ ), demonstrating a likely effect of  
227 psilocybin on SBP. Baseline SBP ranged from 102–140 mmHg, while peak SBP ranged from  
228 126–193 mmHg.

229

230 A t-test for dependent means was conducted to assess the effect that psilocybin had on peak  
231 diastolic blood pressure (DBP). The highest DBP for each participant during the psilocybin  
232 session was documented and these were compared to their baseline DBPs. Figure 3 compares  
233 baseline, average, and peak DBPs in each participant. There was a statistically significant  
234 effect  $t(13) = -5.54, p < 0.001$ . Diastolic blood pressure increased from an average baseline of  
235 76.57 mmHg ( $SD = 7.38$ ) to an average peak of 93.93 mmHg ( $SD = 9.75$ ), demonstrating a likely  
236 effect of psilocybin on DBP. Baseline DBP ranged from 62-89 mmHg, while peak DBP ranged  
237 from 77-109 mmHg.

238  
239 A t-test for dependent means was conducted to assess the effect that psilocybin had on average  
240 SBP. For each participant, all SBP data points collected during the psilocybin session were used  
241 to calculate an average SBP. These averages were compared to baseline SBP (Figure 2). There  
242 was a statistically significant effect  $t(13) = -3.88, p = 0.002$ . Systolic blood pressure increased  
243 from an average baseline of 121.5 mmHg ( $SD = 11.59$ ) to an overall average of 133.03 mmHg  
244 ( $SD = 13.68$ ); this is an average increase of 11.53 mmHg from baseline. Average SBP during the  
245 psilocybin session ranged from 116.6-163.25 mmHg.

246  
247 A t-test for dependent means was conducted to assess the effect that psilocybin had on average  
248 DBP. For each participant, all DBP data points collected during the psilocybin session were used  
249 to calculate an average DBP. These averages were compared to baseline DBP (Figure 3). There  
250 was a statistically significant effect  $t(13) = -3.98, p = 0.002$ . Diastolic blood pressure increased  
251 from an average baseline of 76.57 mmHg ( $SD = 7.38$ ) to an overall average of 86.44 mmHg  
252 ( $SD = 8.08$ ); this is an average increase of 9.87 mmHg. Average DBP during the psilocybin  
253 session ranged from 77-102.88 mmHg.

254  
255 A t-test for dependent means was conducted to examine the effect of psilocybin on peak heart  
256 rate. There was a statistically significant effect  $t(13) = -4.97, p < 0.001$ . Heart rate increased from  
257 a baseline of 68.43 bpm ( $SD = 7.94$ ) to an average peak heart rate of 91.57 bpm ( $SD = 17.25$ ),  
258 demonstrating a likely effect of psilocybin on heart rate. Baseline heart rate ranged from 56-84  
259 bpm, while peak heart rate ranged from 78-143 bpm.

260  
261 A t-test for dependent means was conducted to assess the effect of psilocybin on average heart  
262 rate. There was a statistically significant effect  $t(13) = -3.74, p = 0.002$ . Heart rate increased from  
263 an average baseline of 68.43 bpm ( $SD = 7.94$ ) to an average of 81.21 bpm ( $SD = 11.91$ ),  
264 demonstrating a likely effect of psilocybin on average heart rate. Average heart rate during the  
265 psilocybin session ranged from 72.83-112.8 bpm.

266  
267 A t-test for dependent means was used to assess the effect of psilocybin on QTc interval.  
268 Psilocybin did not produce a significant effect on QTc interval  $t(13) = 2.15, p = 0.051$ , with an  
269 average baseline QTc interval of 419.21 ( $SD = 19.37$ ) and an average maximum QTc interval of  
270 406.64 ( $SD = 16.76$ ). Baseline QTc intervals ranged from 392-453 and maximum QTc intervals  
271 during the psilocybin session ranged from 366-437.

272  
273 Temperature ranged from 35.9-37.5°C during the psilocybin session, with a mean of  
274 36.85 °C ( $SD = 0.32$ ).

275

276 A one-way repeated measures ANOVA was used to assess the effect of psilocybin on depressive  
277 symptoms by assessing QIDS-SR16 scores before the psilocybin session and on day two, day  
278 seven, and week eight after the psilocybin session. There was a significant effect on QIDS-SR16  
279 scores across the different time periods  $F(3, 39) = 3.80, p = 0.018$ . According to the Tukey HSD  
280 post hoc test, QIDS-SR16 scores after eight weeks ( $M = 1.86, SD = 0.86$ ) were significantly  
281 lower than baseline scores  $3.50 (SD = 2.35)$ . No significant differences in scores were seen  
282 between baseline and day two, baseline and day seven, day two and day seven, day two and eight  
283 weeks, or day seven and eight weeks. Day two post-psilocybin QIDS-SR16 scores had a mean  
284 of  $3.29 (SD = 2.27)$  and day seven post-psilocybin QIDS-SR16 scores had a mean of  $2.21 (SD =$   
285  $1.67)$ .

286  
287 A t-test for dependent means was conducted to determine if participants deemed their experience  
288 more mystical in nature two days after vs. seven days after the psilocybin session via the MEQ-  
289 30. There was not a significant difference seen between the two times  $t(13) = 1.35, p = 0.202$ .  
290 The mean MEQ-30 score for two days after the psilocybin session was  $3.77 (SD = 0.80)$ , and the  
291 mean MEQ-30 score for seven days after the psilocybin session was  $3.67 (SD = 0.94)$ . While  
292 there is not a significant difference between these times, both means are representative of a full  
293 mystical experience, which is determined by a score  $\geq 3$ . On day two, the scores ranged from  
294  $2.6-4.93$ , and on day seven the scores ranged from  $2.2-4.93$ . Overall, 11 of the 14 participants  
295 had a full mystical experience.

296  
297 The adverse events experienced were generally mild, expected, and occurred within two days  
298 following the psilocybin session (Table 3). One participant experienced a severe headache during  
299 this time, but it was manageable with Tylenol and Advil. After seven days, the only adverse  
300 event experienced was mild anxiety by one participant, and no adverse events were present by  
301 the eight-week follow-up.

## 302 303 **Discussion**

304  
305 The most significant finding from this safety analysis was the effect psilocybin has on blood  
306 pressure. Statistically significant elevations in both MAP, and systolic and diastolic blood  
307 pressure were seen. However, this observed increase in blood pressure and heart rate were  
308 expected adverse events, based on the known effects that classic psychedelics have on the  
309 cardiovascular system via certain serotonergic receptors (e.g.,  $5-HT_3$  and  $5-HT_{2A}$ ) (Rossi, Hallak,  
310 Bouso Saiz, & Dos Santos, 2022). These receptors are not only directly related to the modulation  
311 of heart rate, but also affect vasoconstriction. While these events were expected, it was also  
312 predicted that such events would be transient and manageable in healthy participants, and this  
313 has been documented in other studies such as in Daniel & Haberman (2017) and Carbonaro,  
314 Johnson, Hurwitz, & Griffiths (2018).

315  
316 While Hasler et al. (2004) did not find an overall significant main effect of psilocybin on MAP,  
317 they extended their analysis further to assess whether blood pressure increased at a particular  
318 time during psilocybin treatment; it was found that MAP was significantly elevated at 60 minutes  
319 post-administration. In a similar manner, DBP was only significantly elevated at 90 minutes  
320 post-administration. Yu et al. (2022) conducted a meta-analysis that analyzed psilocybin's effect  
321 on the cardiovascular system as a secondary outcome. Compared with placebo, psilocybin

322 treatment was associated with a significant increase in both systolic and diastolic blood pressure;  
323 an average increase of 19.00 mmHg and 8.66 mmHg was observed, respectively. This is  
324 comparable to the results of our study, in which there was an average increase in systolic and  
325 diastolic blood pressure from baseline by 11.53 mmHg and 9.87 mmHg, respectively. In a  
326 manner similar to the aforementioned studies, all 14 participants' blood pressures and heart rates  
327 in our study returned to baseline levels as drug effects waned, and these levels remained normal  
328 at the eight-week follow-up appointments.

329  
330 Another parameter of interest was the QTc interval. Dahmane, Hutson, & Gobburu (2021)  
331 conducted a study to determine the concentration-QTc relationship of psilocybin/psilocin. They  
332 determined that in the high dose group (ranging from 42-59 mg), at the time of  $C_{max}$ , the upper  
333 limit of the 90% confidence interval of the mean  $\Delta QTc$  exceeded the threshold level of  
334 regulatory concern (10 ms) at a psilocin concentration of 31.1 ng/mL. Such doses are much  
335 larger than the therapeutic psilocybin dose of 25 mg. At 25 mg, the mean psilocin  $C_{max}$  is about  
336 18.7 ng/mL, with an associated  $\Delta QTc$  of 2.1 ms (and 90% upper confidence level mean of 6.6  
337 ms). Therefore, while psilocybin does have an effect on QTc interval, at therapeutic doses, the  
338 increase is not cause for clinical concern (Dahmane et al., 2021). Our study did not show a  
339 significant change in QTc interval, thus providing further evidence that, in healthy individuals,  
340 QTc prolongation is not a significant concern. The only atypical occurrence seen on three  
341 participants' ECGs were ventricular extrasystoles, which resolved by the following reading.  
342 These are not considered clinically significant, as ventricular extrasystoles only become a cause  
343 for concern if they occur frequently or are symptomatic. No ventricular extrasystoles were seen  
344 on the eight-week follow-up ECGs.

345  
346 Clearly, some individuals will experience blood pressure elevations during psilocybin use that  
347 extend into the hypertensive range; however, because such elevations are transient and  
348 manageable, we do not consider this clinically significant. The cardiovascular system is resilient  
349 enough to endure this brief increase, similarly to which both systolic blood pressure and heart  
350 rate increase during aerobic exercise (Cohen & Townsend, 2007). This research is also supported  
351 by emergency medicine studies that show no adverse outcomes in individuals presenting with  
352 hypertension to the Emergency Department in the ensuing two years (McAlister et al., 2021). As  
353 described by Alley & Copelin (2022), in general, it is normally not necessary to treat  
354 hypertensive urgencies, and it is often advised against due to the danger of unnecessary rapid  
355 correction that could lead to hypoperfusion. Virtually all episodes of hypertension with  
356 psilocybin use are without end-organ damage and do not require treatment.

357  
358 If hypertension presents with symptoms of end-organ damage, such as headache, dizziness,  
359 shortness of breath, chest pain, vomiting, or vision changes, then further evaluation is required  
360 (Alley & Copelin, 2022). End-organ damage secondary to hypertension generally requires  
361 intravenous treatment, and therefore, transfer to the Emergency Department is required; it would  
362 be advisable to give an oral antihypertensive agent while waiting for transport. However, for  
363 most patients who experience hypertension due to drug effect, blood pressure will rapidly correct  
364 itself, especially with the administration of a benzodiazepine if warranted. As seen with one of  
365 the participants in our study, blood pressure increased to 193/108 mmHg during an emotionally  
366 intense period; this participant did not show symptoms of end-organ damage, and as expected,  
367 blood pressure corrected itself to 157/99 mmHg after 25 minutes, without pharmacological



368 intervention. This participant's peak blood pressure is an outlier in this study, as demonstrated by  
369 Figure 1 and Figure 2.

370  
371 For context, despite significant clinical research, there are no examples of significant adverse  
372 physiological events, and despite extensive and longstanding recreational use, there is very scant  
373 evidence of associated physiological adversity. Adverse physiological effects that have occurred  
374 are generally a result of the concomitant use of other recreational drugs, including alcohol. We  
375 would hypothesize that use of psilocybin in the clinical setting would further diminish the risk of  
376 adverse physical outcomes. The only case of psilocybin intoxication resulting in cardiovascular  
377 dysfunction that we could find in the literature is described by Borowiak, Ciechanowski, &  
378 Waloszczuk (1998). This case described an 18-year-old man who was hospitalized following  
379 seizures and cardiopulmonary arrest after consumption of *Psilocybe semilanceata* mushrooms –  
380 the species of *Psilocybe* mushrooms containing the highest psilocybin concentration. This  
381 individual reported frequent psilocybin use, and investigations eventually revealed Wolff-  
382 Parkinson-White syndrome, which presumably contributed to arrhythmia (SVT) and myocardial  
383 infarction following use of the drug in this case. This individual had frequently consumed an  
384 unknown amount of a potent species of mushroom without prior evaluation from his physician –  
385 such uncontrolled conditions would not occur in a clinical setting.

386  
387 Therefore, it would seem that psilocybin has a remarkably benign cardiovascular safety profile,  
388 and we expect that apparently healthy individuals can safely tolerate the therapeutic use of  
389 psilocybin without laboratory investigations or complete physical examinations. This will  
390 increase the accessibility of this treatment for many patients, without significantly compromising  
391 safety. Blood pressure assessment is a simple screening measure to conduct for all individuals  
392 seeking psilocybin-assisted therapy; however, we discourage measuring blood pressure prior to  
393 psilocybin ingestion on the day of treatment for several reasons. First, blood pressure is easily  
394 affected by anxiety; it can add another layer of stress if the message is that the patient will not be  
395 able to proceed with the treatment session if his/her blood pressure is too high. Second, in terms  
396 of maximizing efficacy, the process should not be over-medicalized.

397  
398 Some basic screening measures are appropriate for individuals with known cardiovascular  
399 disease, poor exercise tolerance, or on QTc prolonging medications. In the case of those on QTc  
400 prolonging medications or those with known QTc concerns, an ECG and electrolyte panel should  
401 be performed prior to psilocybin administration. Any patient with uncontrolled hypertension or  
402 exercise-induced myocardial ischemia should have these concerns treated prior to psilocybin  
403 administration. Bloodwork (sodium, potassium, bicarbonate, urea, creatinine, calcium, and  
404 magnesium) should be conducted in those with abnormal or borderline ECGs, on diuretics, or  
405 with malnourishment. While thorough screening is necessary to attenuate the risk of adverse  
406 events from occurring in the first place, practitioners should have rescue medication (e.g.,  
407 labetalol, nitroglycerin, and lorazepam and/or diazepam) on hand in the unlikely event a  
408 hypertensive emergency (or intense anxiety/agitation) occurs. Thus far, research and historical  
409 experience does not suggest that antipsychotic medications have a role in the acute setting.

410  
411 The secondary outcome of our study was to assess the psychological effects of psilocybin; the  
412 specific psychological outcomes assessed were mood and mystical experience. The QIDS-SR16  
413 was administered to participants on four occasions to evaluate mood: two days before the

414 psilocybin session to obtain a baseline score, as well as two days, seven days, and eight weeks  
415 after the psilocybin session. Although the mean scores on days two, seven, and week eight were  
416 all lower than baseline ( $M = 3.50$ ,  $SD = 2.35$ ), only week eight showed a statistically significant  
417 lower score ( $M = 1.86$ ,  $SD = 0.86$ ). The QIDS-SR16 is a self-administered questionnaire that  
418 evaluates depressive symptomatology and correlates with the nine DSM-IV symptom criteria for  
419 depression; it is scored from 0-27, with higher scores indicating more severe depressive  
420 symptoms. Scores from 0-5 indicate no depression, 6-10 indicate mild depression, 11-15  
421 moderate depression, 16-20 severe depression, and 21-27 very severe depression. Although a  
422 statistically significant decrease was seen from baseline to week eight, it does not represent a  
423 clinically significant difference when the overall scoring of the questionnaire is considered. This  
424 scale is designed to measure depression, whereas only one out of 14 participants' baseline scores  
425 crossed the threshold for depression (with a score of 10). The mean scores of 3.50 at baseline and  
426 1.86 at week-eight both signify no depression. As such, a limitation of our study was that this  
427 questionnaire was not the most sensitive tool to assess mood in healthy participants. A  
428 questionnaire that assesses mental well-being, such as the Brief Index of Self-actualization  
429 (BISA) revised, is likely a more appropriate tool to use to assess healthy participants;  
430 measurements of self-actualization are based on the idea that mental well-being should consider  
431 more than just the absence of disease, and should examine the extent to which personal potential  
432 is realized and achieved (Sumerlin & Bundrick, 1998). However, given the decrease in QIDS-  
433 SR16 scores in participants not suffering from clinical depression, we hypothesize that a  
434 commensurate or greater decrease would be seen in those suffering from depressive disorders.  
435

436 Despite the fact that the QIDS-SR16 was not a sensitive tool for the assessment of mood in  
437 healthy participants, there are several clinically useful conclusions that can be drawn from the  
438 scores observed in our study. Although only experienced by a minority of participants ( $n = 3$ ), it  
439 is important for practitioners to recognize the possibility that depressive symptoms may  
440 temporarily increase during the first week following a psilocybin treatment. Therefore,  
441 practitioners should follow-up with their clients during this time to ensure their well-being. It is  
442 widely accepted that this is a fertile time period for integration of the psychedelic experience,  
443 and it is hypothesized that the associated neuroplastic effects of psilocybin may help instantiate  
444 the therapeutic effects of therapy during this timeframe. With therapy, the brain can retain the  
445 new neural connections that the psychedelic state has cultivated. Essentially, in addition to the  
446 psilocybin-induced insights and biological changes that occur as a result of the acute drug  
447 effects, psilocybin also primes the brain for learning and healing in the weeks immediately  
448 following psilocybin use.  
449

450 The MEQ-30 was the tool used to evaluate another subjective effect induced by psilocybin – the  
451 mystical experience. It is a 30-question, self-report questionnaire that assesses four different  
452 factors of the mystical experience: mysticism, positive mood, transcendence of space and time,  
453 and ineffability. Each question is scored on a scale of 0-5 and the final score is an average of all  
454 30 questions. A score  $\geq 3$  represents a full mystical experience. In studies to date, the mystical  
455 experience appears to be positively associated with the therapeutic effects of psilocybin, and it is  
456 ultimately the combination of both physiological modifications in the brain and emotionally  
457 meaningful insights that drive the transformational changes that the patient experiences  
458 (Gukasyan & Nayak, 2021).  
459

460 In our study, the MEQ-30 was completed on days two and seven after the psilocybin session.  
461 Participants' perception of their mystical experience (or lack thereof) was not significantly  
462 different between the two measurements. Only three of 14 participants did not score  $\geq 3$ . The  
463 mystical experience is often determined by "set" (factors related to the individual's mindset as  
464 they enter the psychedelic session, including idiosyncratic personality dynamics, mood, past  
465 experiences, and expectations of the psilocybin experience), "setting" (the environment in which  
466 the psilocybin session occurs, including the cultural, physical, and social environment), dose, and  
467 individual pharmacokinetic characteristics (Hartogsohn, 2016). A 25 mg dose of psilocybin is  
468 equivalent to approximately 4-5 g of dried *Psilocybe cubensis* mushrooms (Haden, 2020). We  
469 speculate that one of our participants is a fast metabolizer of psilocybin, due to the fact that this  
470 participant only had a 30-minute experience, characterized by relaxation but not by the typical  
471 psychedelic effects. Of note, while this participant did not have a mystical experience, an  
472 increase in well-being was still described.

473  
474 During the eight-week follow-up appointments, participants described the common experience of  
475 feeling "better," "happier," and "lighter" after the psilocybin session, despite not having  
476 perceived themselves as anxious prior to the session. Participants suggested that they had  
477 previously become accustomed to their prior levels of anxiety, as they did not have a reference  
478 point for comparison. After experiencing improvements in their mental well-being following  
479 psilocybin use, many participants felt optimistic that they would experience a greater sense of  
480 well-being in the future.

#### 481 482 **Conflict of Interest**

483 Jennifer N. Bennett is a Medical Writer and Research Assistant at ATMA Journey Centers Inc.  
484 Michael D. Blough is the Chief Science Officer at ATMA Journey Centers Inc. Ravinder Bains  
485 is the Chief Medical Officer at ATMA Journey Centers Inc. Lyle Galloway is a Medical Advisor  
486 at ATMA Journey Centers Inc. Ian Mitchell is an instructor for the ATMA Journey Centers Inc.  
487 Introduction to Psychedelic-Assisted Therapy course.

#### 488 489 **Author Contributions**

490  
491 JB, MB, RB, LG contributed to the conception and design of the study. JB organized the  
492 database. JB performed the statistical analysis. JB wrote the first draft of the manuscript. JB, RB,  
493 IM wrote sections of the manuscript. All authors contributed to manuscript revision, and read  
494 and approved the submitted version.

#### 495 496 **Funding**

497  
498 This study was funded by ATMA Journey Centers Inc.

#### 499 500 **Acknowledgments**

501  
502 We would like to thank The Newly Institute for the use of their facilities.

503  
504 We would like to thank Natalie Bergstrom and Debbie White for their involvement in participant  
505 intake and data collection.

506 Figure 1: Comparison of baseline MAP to peak MAP during the psilocybin session for each  
 507 participant.

508  
 509 Figure 2: Comparison of each participant’s baseline SBP to the average and peak SBPs during  
 510 the psilocybin session.

511  
 512 Figure 3: Comparison of each participant’s baseline DBP to the average and peak DBPs during  
 513 the psilocybin session.

514  
 515 Table 1: Participants’ demographic information.

| Characteristic                 | n = 14            |
|--------------------------------|-------------------|
| Age, range (mean, SD)          | 32-64 (46, 10.33) |
| Gender, n (%)                  |                   |
| Female                         | 11 (78.6)         |
| Male                           | 3 (21.4)          |
| Designations, n (%)            |                   |
| Registered Nurse               | 3 (21.4)          |
| Registered Psychiatric Nurse   | 1 (7.1)           |
| Occupational Therapist         | 1 (7.1)           |
| Registered Social Worker       | 3 (21.4)          |
| Registered Psychologist        | 4 (28.6)          |
| Registered Clinical Counsellor | 1 (7.1)           |
| Registered Psychotherapist     | 1 (7.1)           |

516  
 517  
 518 Table 2: Summary of vital signs (primary outcome) and psychological questionnaires (secondary  
 519 outcome).

|                         |                       |                  | Mean   | SD          | Range          | Reference Range |
|-------------------------|-----------------------|------------------|--------|-------------|----------------|-----------------|
| <b>Primary Outcomes</b> | MAP (mmHg)            | Baseline         | 91.55  | 7.59        | 79.67 - 104    | 70 - 100        |
|                         |                       | Peak Psilocybin* | 110.76 | 12.15       | 93.33 - 126.67 |                 |
|                         | Blood Pressure (mmHg) | Baseline SBP     | 121.5  | 11.59       | 102 - 140      | 90 - 120        |
|                         |                       | Baseline DBP     | 76.57  | 7.38        | 62 - 89        | 60 - 80         |
|                         |                       | Peak SBP*        | 145.93 | 19.01       | 126 - 193      |                 |
|                         |                       | Peak DBP*        | 93.93  | 9.75        | 77 - 109       |                 |
|                         |                       | Average SBP*     | 133.03 | 13.68       | 116.6 - 163.25 |                 |
|                         | Average DBP*          | 86.44            | 8.08   | 77 - 102.88 |                |                 |
|                         | Heart Rate            | Baseline         | 68.43  | 7.94        | 56 - 84        | 60 - 100        |

|                           |                     |        |       |               |                             |
|---------------------------|---------------------|--------|-------|---------------|-----------------------------|
| (bpm)                     | Peak Heart Rate*    | 91.57  | 17.25 | 78 - 143      |                             |
|                           | Average Heart Rate* | 81.21  | 11.91 | 72.83 - 112.8 |                             |
| QTc Interval<br>(msec)    | Baseline            | 419.21 | 19.37 | 392 - 453     | 350 - 460                   |
|                           | Maximum Psilocybin  | 406.64 | 16.76 | 366 - 437     |                             |
| Temperature(°C)           | Psilocybin          | 36.85  | 0.32  | 35.9 - 37.5   | 36.1 - 37.2                 |
| <b>Secondary Outcomes</b> |                     |        |       |               | Scoring                     |
| QIDS-SR16                 | Baseline            | 3.50   | 2.35  | 1 - 11        | 6 - 10 mild                 |
|                           | Day Two             | 3.29   | 2.27  | 1 - 12        | 11 - 15 moderate            |
|                           | Day Seven           | 2.21   | 1.67  | 0 - 9         | 16 - 20 severe              |
|                           | Week Eight*         | 1.86   | 0.86  | 1 - 6         | ≥21 very severe             |
| MEQ-30                    | Day Two             | 3.77   | 0.8   | 2.6 - 4.93    | ≥3 full mystical experience |
|                           | Day Seven           | 3.67   | 0.94  | 2.2 - 4.93    |                             |

\* denotes a statistically significant difference compared to baseline

520  
521 Table 3: Total number of adverse events (out of 14 participants) occurring two days, seven days,  
522 and eight weeks after the psilocybin session.

| Adverse Event                                                 | Mild | Moderate | Severe | Life-threatening | Fatal |
|---------------------------------------------------------------|------|----------|--------|------------------|-------|
| <b>2 days post-psilocybin</b>                                 |      |          |        |                  |       |
| Nausea                                                        | 3    |          |        |                  |       |
| Vomiting                                                      |      |          |        |                  |       |
| Headache                                                      | 2    | 3        | 1      |                  |       |
| Anxiety                                                       | 1    |          |        |                  |       |
| Confusion                                                     | 2    |          |        |                  |       |
| Temporary fatigue or difficulty sleeping throughout the night | 3    | 1        |        |                  |       |
| Anxiety, mania, or psychotic symptoms                         |      |          |        |                  |       |
| Other                                                         |      |          |        |                  |       |
| <b>7 days post-psilocybin</b>                                 |      |          |        |                  |       |
| Nausea                                                        |      |          |        |                  |       |
| Vomiting                                                      |      |          |        |                  |       |
| Headache                                                      |      |          |        |                  |       |
| Anxiety                                                       | 1    |          |        |                  |       |
| Confusion                                                     |      |          |        |                  |       |
| Fatigue                                                       |      |          |        |                  |       |

|                                       |  |  |  |  |  |
|---------------------------------------|--|--|--|--|--|
| Anxiety, mania, or psychotic symptoms |  |  |  |  |  |
| Other                                 |  |  |  |  |  |
| 8 weeks post-psilocybin               |  |  |  |  |  |
| Nausea                                |  |  |  |  |  |
| Vomiting                              |  |  |  |  |  |
| Headache                              |  |  |  |  |  |
| Anxiety                               |  |  |  |  |  |
| Confusion                             |  |  |  |  |  |
| Fatigue                               |  |  |  |  |  |
| Anxiety, mania, or psychotic symptoms |  |  |  |  |  |
| Other                                 |  |  |  |  |  |

523  
524  
525  
526  
527  
528  
529  
530  
531  
532  
533  
534  
535  
536  
537  
538  
539  
540  
541  
542  
543  
544  
545  
546  
547  
548  
549  
550  
551  
552

## References

- 553  
554  
555 Alley, W. D., & Copelin, I. E. (2022). Hypertensive Urgency. In StatPearls.  
556 <https://www.ncbi.nlm.nih.gov/pubmed/30020723>  
557
- 558 Borowiak, K. S., Ciechanowski, K., & Waloszczyk, P. (1998). Psilocybin mushroom (*Psilocybe*  
559 *semilanceata*) intoxication with myocardial infarction. *J Toxicol Clin Toxicol*, *36*(1-2), 47-49.  
560 <https://doi.org/10.3109/15563659809162584>  
561
- 562 Carbonaro, T. M., Johnson, M. W., Hurwitz, E., & Griffiths, R. R. (2018). Double-blind comparison of  
563 the two hallucinogens psilocybin and dextromethorphan: Similarities and differences in  
564 subjective experiences. *Psychopharmacology*, *235*(2), 521-534. [https://doi.org/10.1007/s00213-](https://doi.org/10.1007/s00213-017-4769-4)  
565 [017-4769-4](https://doi.org/10.1007/s00213-017-4769-4)  
566
- 567 Carhart-Harris, R. L., & Goodwin, G. M. (2017). The Therapeutic Potential of Psychedelic Drugs: Past,  
568 Present, and Future. *Neuropsychopharmacology*, *42*(11), 2105-2113.  
569 <https://doi.org/10.1038/npp.2017.84>  
570
- 571 Cohen, D. L., & Townsend, R. R. (2007). Exaggerated Systolic Blood Pressure Response To Exercise.  
572 *The Journal of Clinical Hypertension*, *9*(4), 291-292.  
573 <https://doi.org/https://doi.org/10.1111/j.1524-6175.2007.06272.x>  
574
- 575 Dahmane, E., Hutson, P. R., & Gobburu, J. V. S. (2021). Exposure-Response Analysis to Assess the  
576 Concentration-QTc Relationship of Psilocybin/Psilocin. *Clin Pharmacol Drug Dev*, *10*(1), 78-  
577 85. <https://doi.org/10.1002/cpdd.796>  
578
- 579 Daniel, J., & Haberman, M. (2017). Clinical potential of psilocybin as a treatment for mental health  
580 conditions. *Ment Health Clin*, *7*(1), 24-28. <https://doi.org/10.9740/mhc.2017.01.024>  
581
- 582 DEA. (2020). Psilocybin. *Drug Fact Sheet*. [https://www.dea.gov/sites/default/files/2020-](https://www.dea.gov/sites/default/files/2020-06/Psilocybin-2020_0.pdf)  
583 [06/Psilocybin-2020\\_0.pdf](https://www.dea.gov/sites/default/files/2020-06/Psilocybin-2020_0.pdf)  
584
- 585 Gukasyan, N., & Nayak, S. M. (2022). Psychedelics, placebo effects, and set and setting: Insights from  
586 common factors theory of psychotherapy. *Transcultural Psychiatry*, *59*(5), 652-664.  
587 <https://doi.org/10.1177/1363461520983684>  
588
- 589 Haden, M. (2020). *Manual for Psychedelic Guides*.
- 590 Hartogsohn, I. (2016). Set and setting, psychedelics, and the placebo response: An extra-  
591 pharmacological perspective on psychopharmacology. *J Psychopharmacol*, *30*(12), 1259-  
592 1267. <https://doi.org/10.1177/0269881116677852>
- 593  
594 Hasler, F., Grimberg, U., Benz, M. A., Huber, T., & Vollenweider, F. X. (2004). Acute psychological  
595 and physiological effects of psilocybin in healthy humans: a double-blind, placebo-controlled

- 596 dose-effect study. *Psychopharmacology (Berl)*, 172(2), 145-156. <https://doi.org/10.1007/s00213->  
597 003-1640-6  
598  
599 Lowe, H., Toyang, N., Steele, B., Valentine, H., Grant, J., Ali, A., Ngwa, W., & Gordon, L. (2021). The  
600 Therapeutic Potential of Psilocybin. *Molecules*, 26(10).  
601 <https://doi.org/10.3390/molecules26102948>  
602  
603 McAlister, F. A., Youngson, E., & Rowe, B. H. (2021). Elevated blood pressures are common in the  
604 emergency department but are they important? A retrospective cohort study of 30,278 adults.  
605 *Ann Emerg Med*, 77(4), 425-432. <https://doi.org/10.1016/j.annemergmed.2020.11.005>  
606  
607 McCulloch, D. E. W., Madsen, M. K., Stenbæk, D. S., Kristiansen, S., Ozenne, B., Jensen, P. S.,  
608 Knudsen, G. M., & Fisher, P. M. (2022). Lasting effects of a single psilocybin dose on resting-  
609 state functional connectivity in healthy individuals. *Journal of psychopharmacology (Oxford,*  
610 *England)*, 36(1), 74-84. <https://doi.org/10.1177/02698811211026454>  
611  
612 Rossi, G. N., Hallak, J. E. C., Bouso Saiz, J. C., & Dos Santos, R. G. (2022). Safety issues of psilocybin  
613 and LSD as potential rapid acting antidepressants and potential challenges. *Expert Opin Drug*  
614 *Saf*, 21(6), 761-776. <https://doi.org/10.1080/14740338.2022.2066650>  
615  
616 Siegel, A. N., Meshkat, S., Benitah, K., Lipsitz, O., Gill, H., Lui, L. M. W., Teopiz, K. M., McIntyre, R.  
617 S., & Rosenblat, J. D. (2021). Registered clinical studies investigating psychedelic drugs for  
618 psychiatric disorders. *J Psychiatr Res*, 139, 71-81.  
619 <https://doi.org/10.1016/j.jpsychires.2021.05.019>  
620  
621 Sumerlin, J. R., & Bundrick, C. M. (1998). REVISION OF THE BRIEF INDEX OF SELF-  
622 ACTUALIZATION. *Perceptual and Motor Skills*, 87, 115-125.  
623  
624 Yu, C.-L., Liang, C.-S., Yang, F.-C., Tu, Y.-K., Hsu, C.-W., Carvalho, A. F., Stubbs, B., Thompson, T.,  
625 Tsai, C.-K., Yeh, T.-C., Yang, S.-N., Shin, J. I., Chu, C.-S., Tseng, P.-T., & Su, K.-P. (2022).  
626 Trajectory of Antidepressant Effects after Single- or Two-Dose Administration of Psilocybin: A  
627 Systematic Review and Multivariate Meta-Analysis. *Journal of Clinical Medicine*, 11(4), 938.  
628 <https://www.mdpi.com/2077-0383/11/4/938>  
629

### 630 **Data Availability Statement**

631  
632 The original datasets presented in the study are available in a publicly accessible repository. This  
633 data can be found here: <https://doi.org/10.6084/m9.figshare.22329433.v1>



medRxiv preprint doi: <https://doi.org/10.1101/2023.04.12.23288325>; this version posted April 19, 2023. The copyright holder for this preprint (which was not certified by peer review) is the author/funder, who has granted medRxiv a license to display the preprint in perpetuity. It is made available under a [CC-BY-NC-ND 4.0 International license](https://creativecommons.org/licenses/by-nc-nd/4.0/).

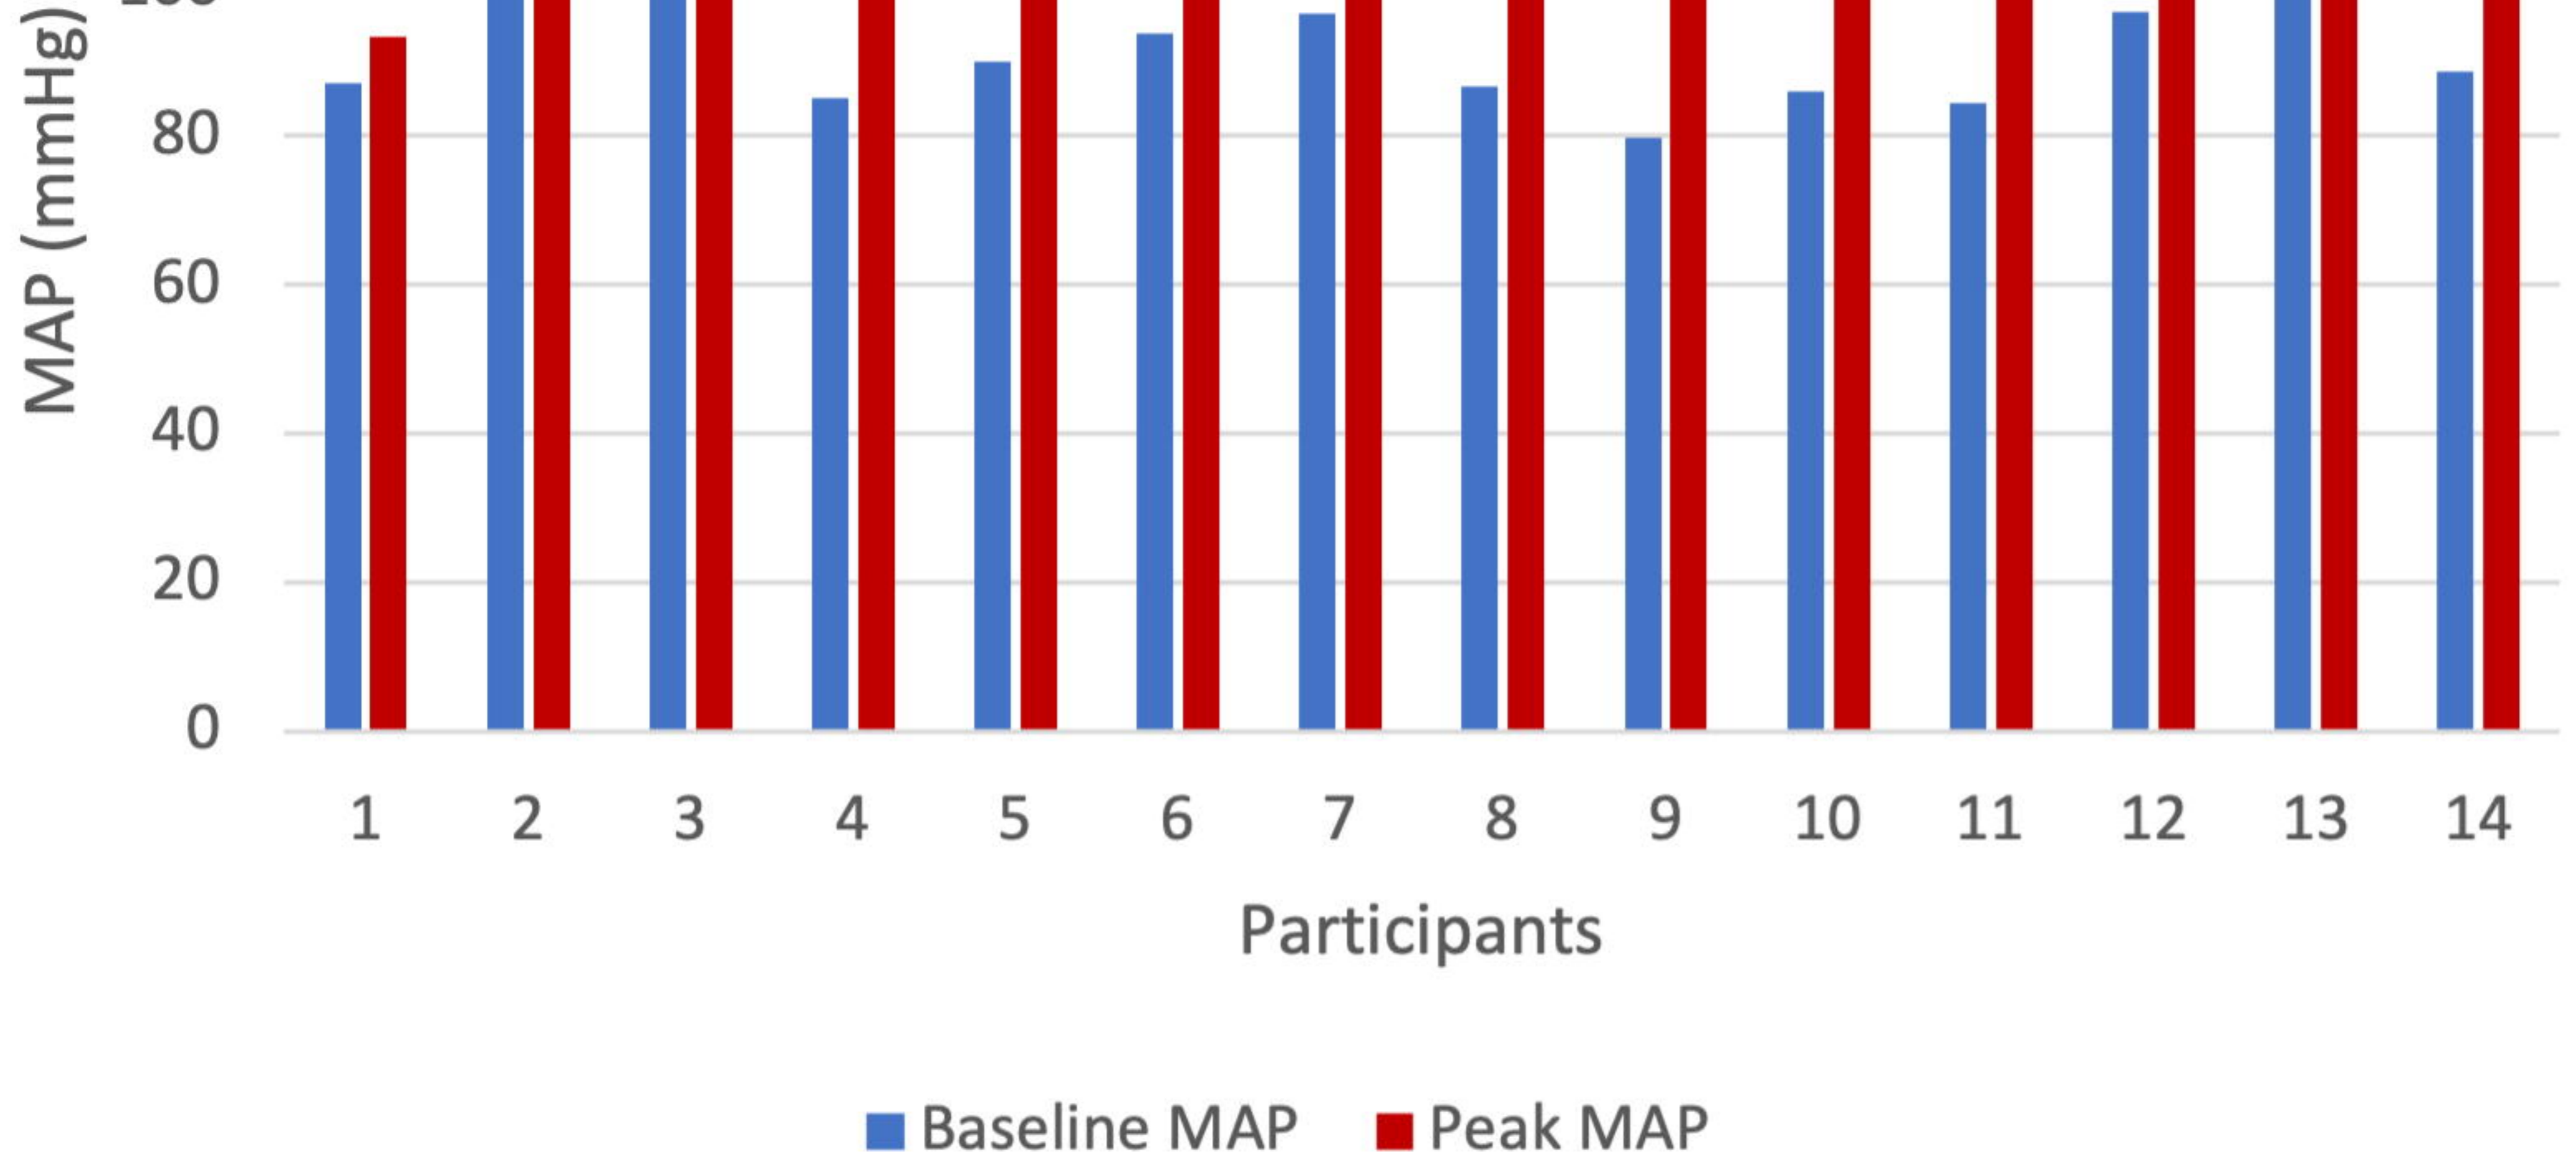

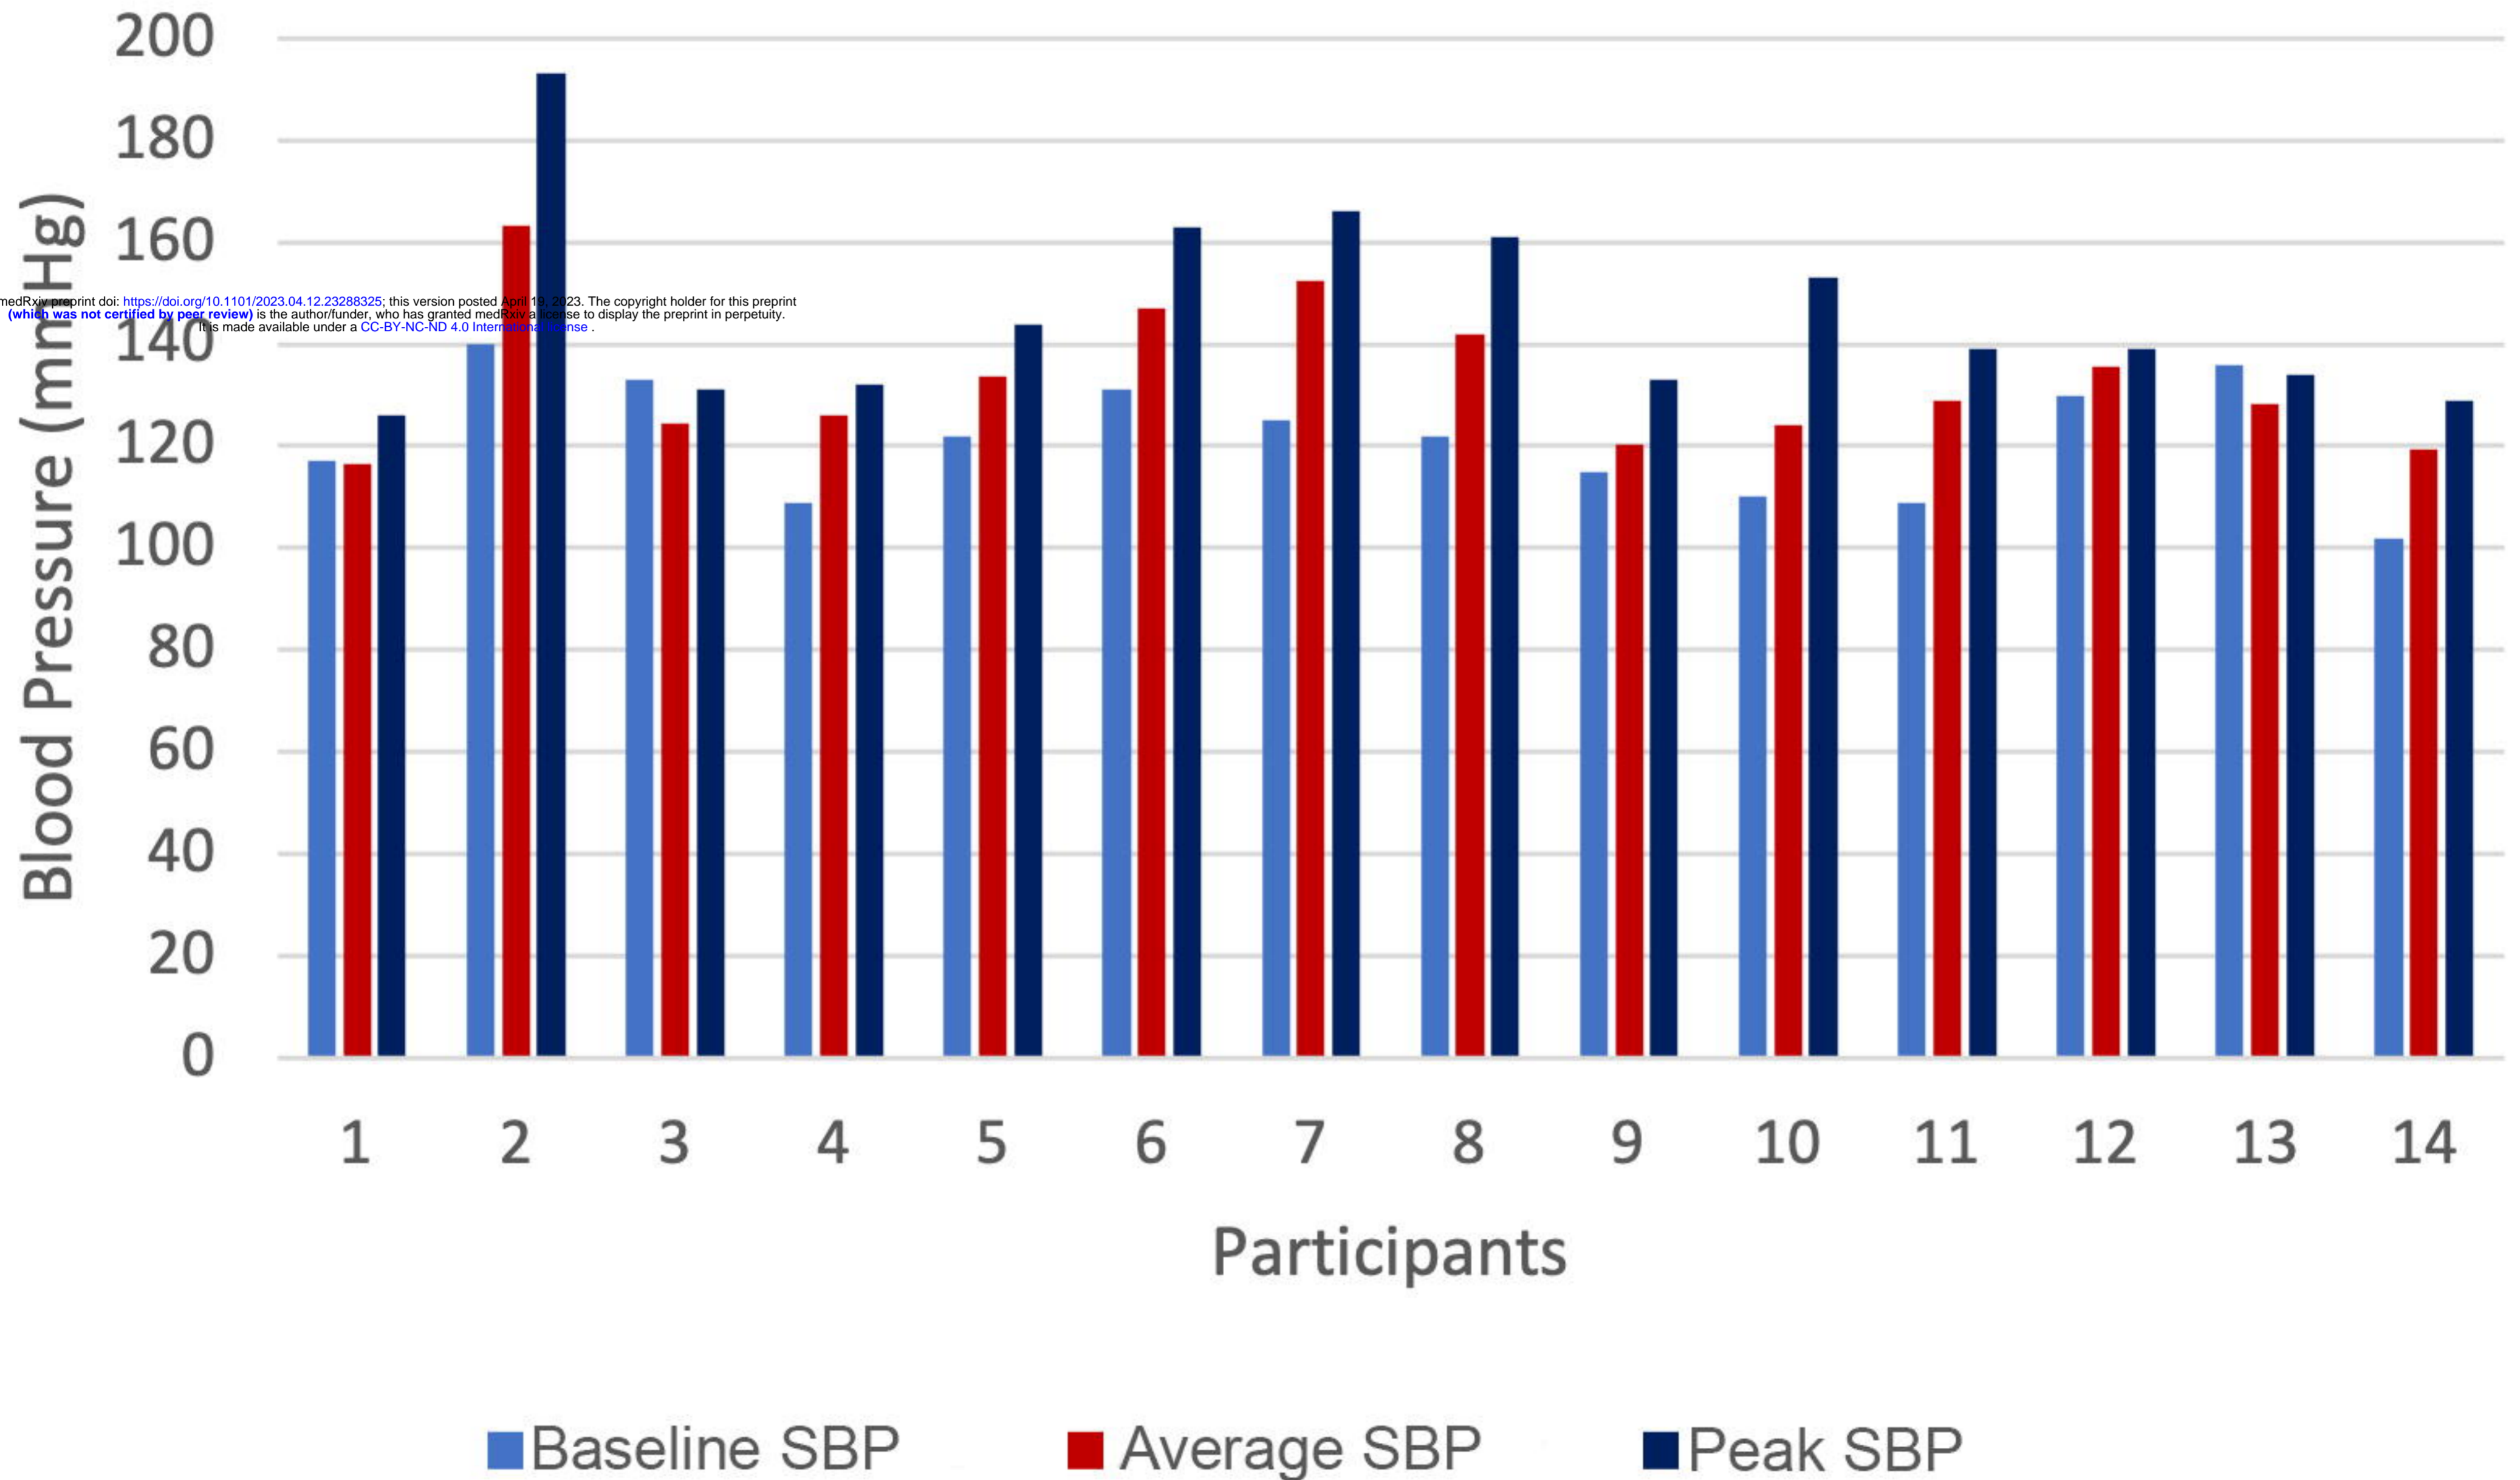

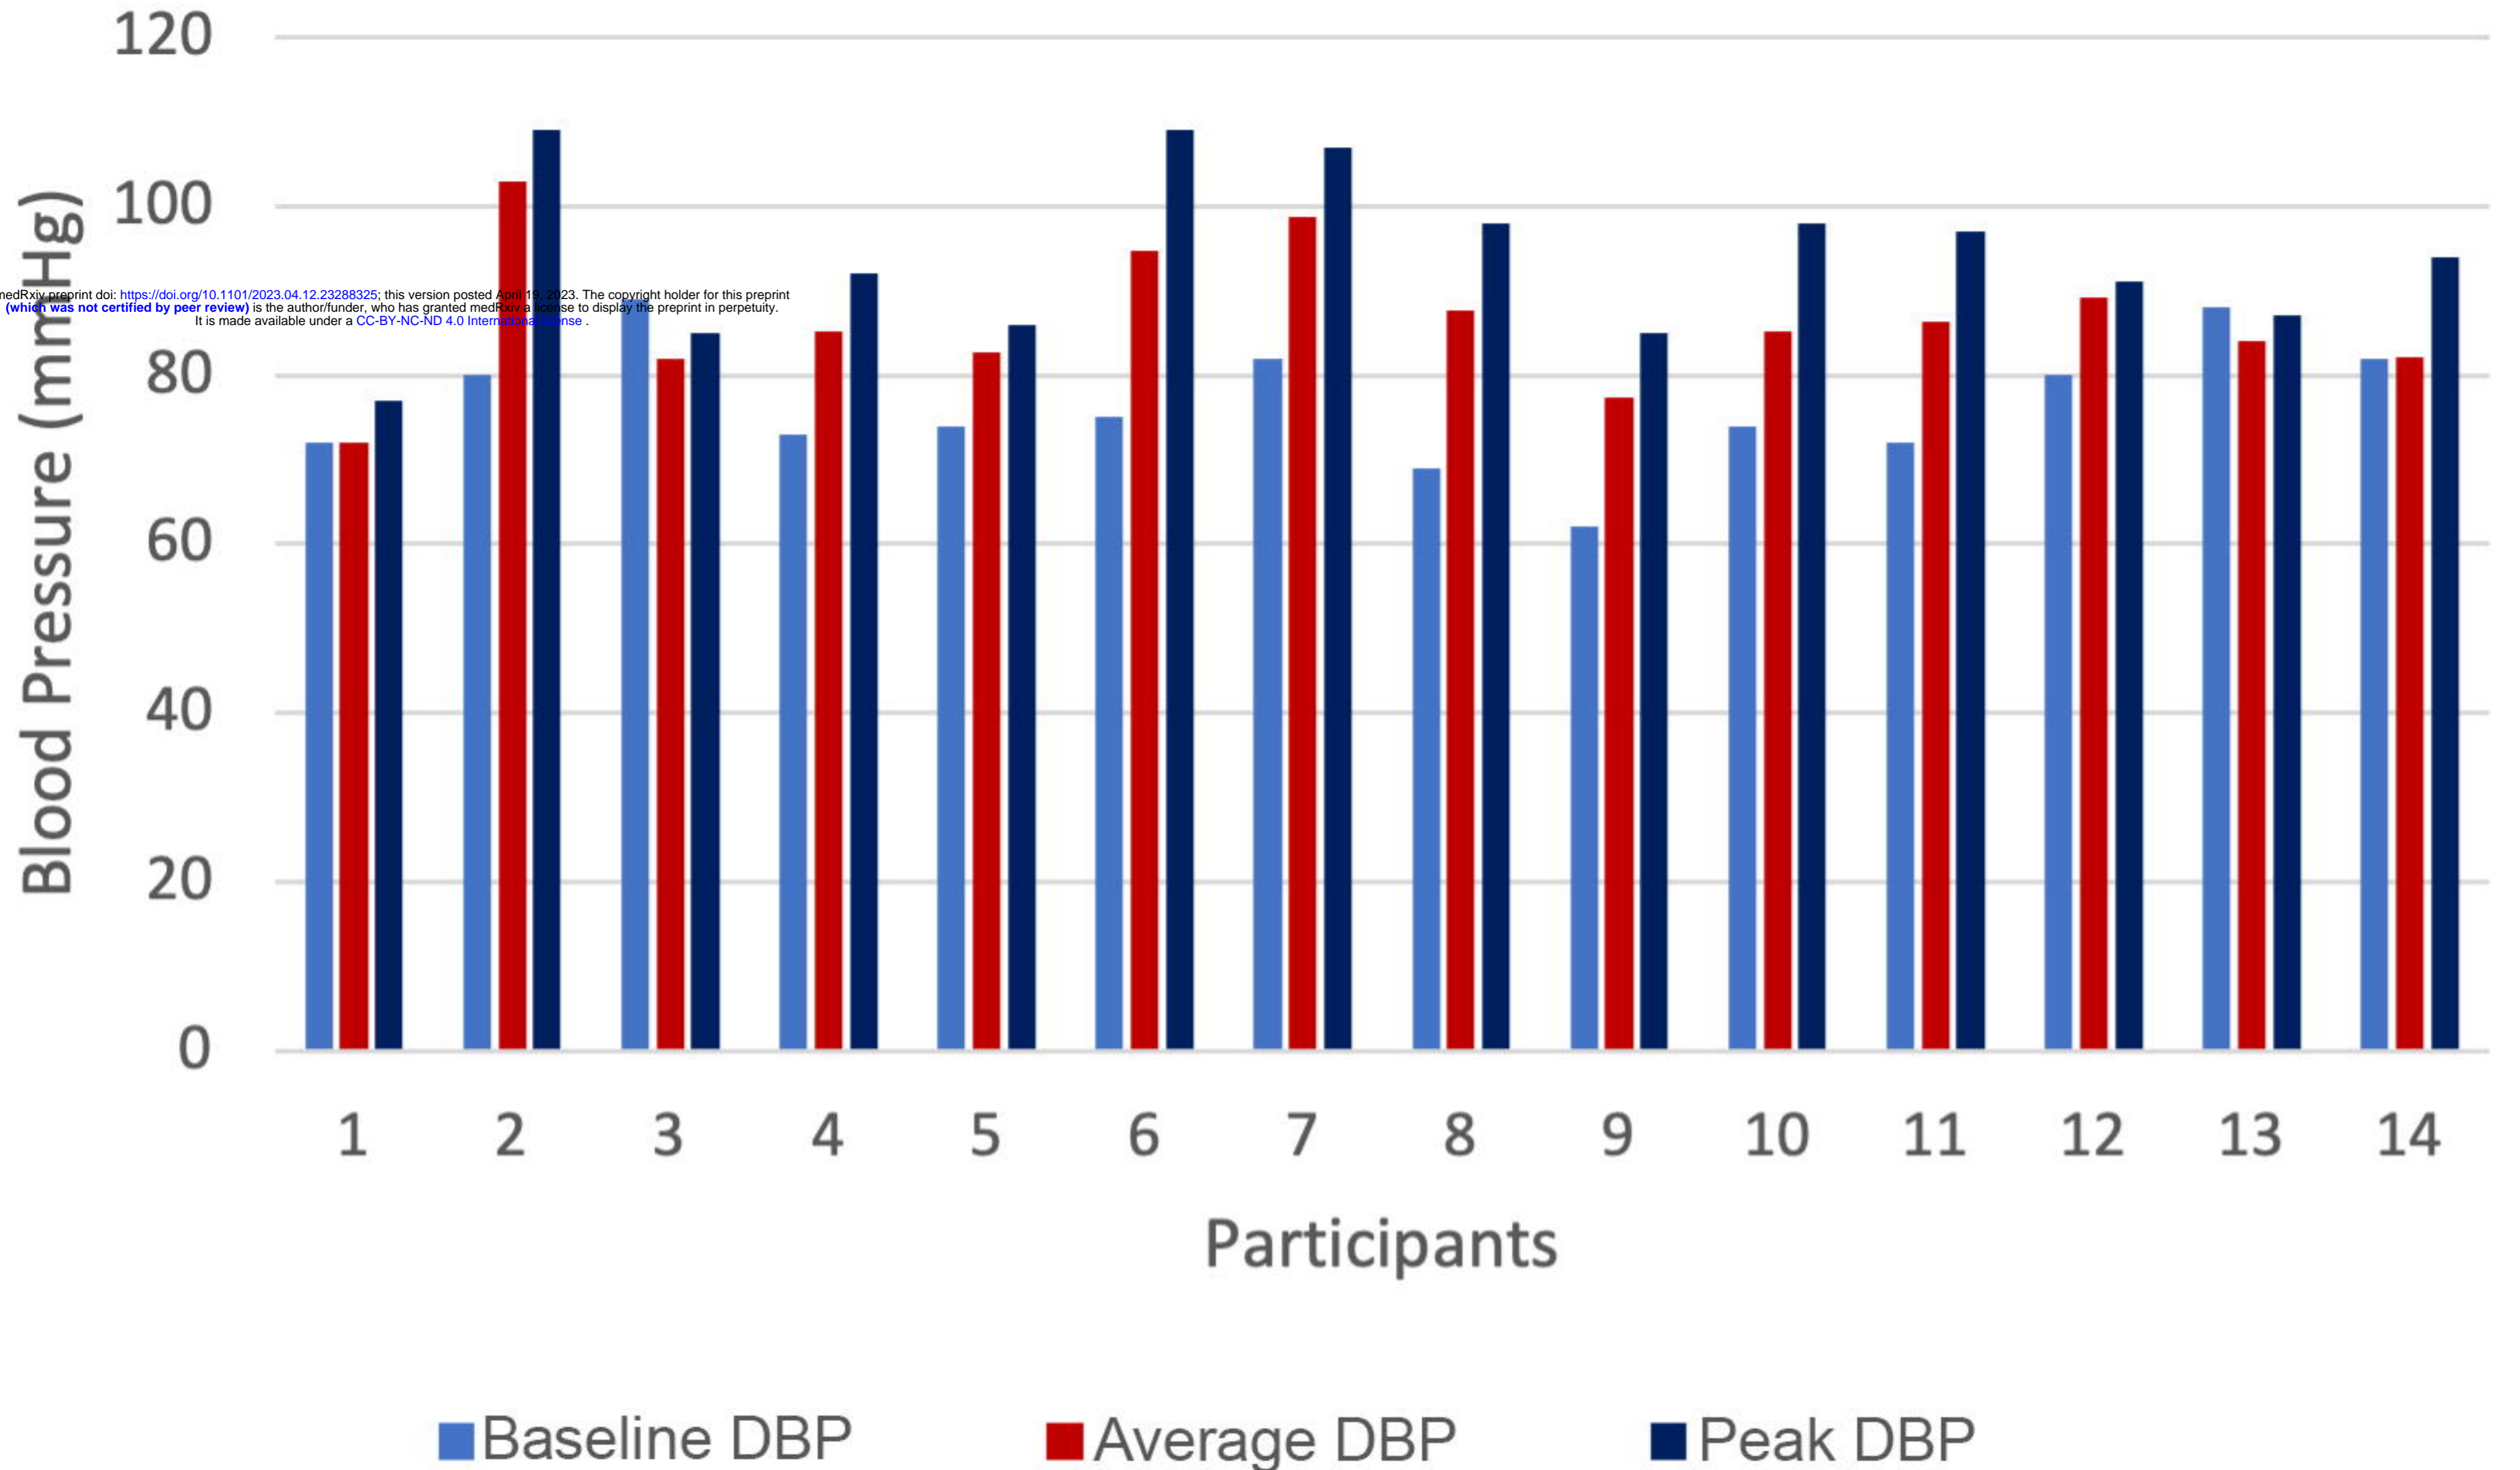

Source: https://medrxiv.org/content/10.1101/2023.04.12.23288325v1.full.pdf
